# Supplementary material for: Gene-environment dependencies lead to collider bias in models with polygenic scores
Source: PubMed Central journal article supplement (PMC8097011; doi:10.1038/s41598-021-89020-x), 2021-05-04
Supplement: 41598_2021_89020_MOESM1_ESM.pdf [file 41598_2021_89020_MOESM1_ESM.pdf]

1

# Supplementary Information

2

**Gene-environment dependencies lead to collider bias in**

3

**models with polygenic scores**

4

Evelina T. Akimova,<sup>1,2,\*</sup> Richard Breen,<sup>1,3</sup> David M. Brazel,<sup>2,3</sup> Melinda C. Mills<sup>2,3</sup>

5

*<sup>1</sup> Department of Sociology, University of Oxford, Oxford, OX1 1JD, United Kingdom*

6

*<sup>2</sup> Leverhulme Centre for Demographic Science, University of Oxford, Oxford, OX1 1JD,*

7

*United Kingdom*

8

*<sup>3</sup> Nuffield College, University of Oxford, Oxford, OX1 1NF, United Kingdom*

9

\*Corresponding author. Email address: [evelina.akimova@sociology.ox.ac.uk](mailto:evelina.akimova@sociology.ox.ac.uk)

10 **S1. Expressions for the bias in gene-environment models due to**  
11 **interdependency of polygenic scores and environments**

12 The main text provided a general description of endogenous selection bias when  
13 polygenic scores and environments are not independent. Here we further illustrate  
14 this issue by deriving exact expressions for the bias under the assumption of linear  
15 relationships that can be modelled using regression analysis.

16 We assume that the data have been generated by the DAG shown in Figure  
17 1A. Here  $U$  is an unobserved variable or set of variables that confounds the  $E - Y$   
18 relationship (this is equivalent to, but, in our view more transparent than, a  
19 depiction that would include correlated error terms for  $E$  and  $Y$ ). We further  
20 assume that all the variables have unit standard deviation and that  $G$  is  
21 exogenous.

22 *S1.1 Additive model*

23 When the effects of  $G$  and  $E$  on  $Y$  are additive the true linear models given the  
24 data-generating process are:

25 
$$E(E|G, U) = \alpha_0 + \alpha_1 G + \alpha_2 U \quad (\text{Equation S1})$$

26 
$$E(Y|G, E, U) = \beta_0 + \beta_1 G + \beta_2 E + \beta_3 U \quad (\text{Equation S2})$$

27 We assume that the parameters  $\alpha_1$ ,  $\beta_1$ , and  $\beta_2$  are all positive.

28 If estimate the models:

29 
$$E(E|G) = a_0 + a_1 G \quad (\text{Equation S3})$$

30  $E(Y|G, E) = b_0 + b_1G + b_2E$  (Equation S4)

31 the relationships between the true and estimated parameters are:

32  $b_1 = \beta_1 - \frac{\alpha_1\alpha_2\beta_3}{1-\alpha_1^2}$  (Equation S5)

33  $b_2 = \beta_2 + \frac{\alpha_2\beta_3}{1-\alpha_1^2}$  (Equation S6)

34 The proof is as follows. Let  $\beta_{YG}$  denote the coefficient of the unconditional  
 35 regression of Y on G and likewise for  $\beta_{YE}$ . Then, tracing the paths linking G and  
 36 Y in the Figure A1a we have:

37 
$$\beta_{YG} = \beta_1 + \beta_2\alpha_1$$

38 and

39 
$$\beta_{YE} = \beta_2 + \beta_1\alpha_1 + \beta_3\alpha_2$$

40 Given that  $\beta_{EG} = \alpha_1$  we then apply the standard formula to derive conditional  
 41 regression coefficients from unconditional:

42 
$$b_1 = \frac{\beta_{YG} - \beta_{YE}\alpha_1}{1 - \alpha_1^2} = \frac{\beta_1 + \beta_2\alpha_1 - (\beta_2 + \beta_1\alpha_1 + \beta_3\alpha_2)\alpha_1}{1 - \alpha_1^2}$$

43 Straightforward algebra yields (S5).  $b_2$  is derived similarly. Notice, however,  
 44 that  $a_1 = \alpha_1$  because G and U are unconditionally independent.

45 The bias in both estimates depends on the sign of  $\alpha_2 \times \beta_3$ : if this is positive  
 46 the estimate of the partial effect of G on Y, given E, will be downwardly biased and  
 47 the estimate of the effect of E on Y, given G, will be upwardly biased. If there is  
 48 no correlation between G and E ( $\alpha_1 = 0$ ) then  $b_1$  will be unbiased. If there is no

49 effect of an unmeasured confounder (either  $\alpha_2 = 0$  and/or  $\beta_3 = 0$ ) both  $b_1$  and  $b_2$   
50 will be unbiased. The bias in the effect of G on Y has a different sign than the bias  
51 in the effect of E on Y: if the bias in the latter is positive, the size of the genetic  
52 effect will be underestimated relative to the environmental effect.

53 The example of coefficient deflation from Papageorge and Thom<sup>1</sup> can be  
54 demonstrated following Equation S5. For instance, considering the case on  
55 nonroutine interactive job tasks as the dependent variable, we see that the  
56 baseline coefficient of the educational attainment polygenic score is 0.185, which  
57 reflects a model without any environmental and phenotypic covariates (Table 6 in  
58 Papageorge and Thom<sup>1</sup>). In the model with educational controls (respondent's  
59 years of schooling and parental education), the polygenic score coefficient drops to  
60 0.055 reflecting a 70% negative change. Since the dependent variable is  
61 standardised, we can assess the relative importance of collider bias which is  $\frac{\alpha_1\alpha_2\beta_3}{1-\alpha_1^2}$   
62 from Equation S5 under additional assumptions. If we allow the coefficient of the  
63 correlation between educational attainment polygenic score and respondents  
64 years of schooling  $\alpha_1=0.300$ , and the presence of unobserved confounder U,  
65 positively correlated with both years of schooling and job task (for example, living  
66 in advantaged neighbourhood as a child), we have  $\alpha_2 = 0.250$  and  $\beta_3 = 0.250$ .  
67 These are all plausible and rather modest suggestions following correlation matrix  
68 from Table 6 in Papageorge and Thom<sup>1</sup>, leading the inflation bias to be:

$$69 \quad \frac{\alpha_1\alpha_2\beta_3}{1-\alpha_1^2} = \frac{0.300 \times 0.250 \times 0.250}{1-0.300^2} = 0.021$$

70 which explains 16% downward change of polygenic score coefficient.

71 *S1.2 G×E interaction model*

72 The DAG in Figure 2A shows the case in which the effect of G on Y varies with E.

73 In this case, the true linear models given the data-generating process are:

74 
$$E(E|G, U) = \alpha_0 + \alpha_1 G + \alpha_2 U \quad (\text{Equation S7})$$

75 
$$E(Y|G, E, U) = \beta_0 + \beta_1 G + \beta_2 E + \beta_3 U + \beta_4(GE) \quad (\text{Equation S8})$$

76 We estimate:

77 
$$E(E|G) = a_0 + a_1 G \quad (\text{Equation S9})$$

78 
$$E(Y|G, E) = b_0 + b_1 G + b_2 E + b_4 GE \quad (\text{Equation S10})$$

79 In this case,  $b_4$  is an unbiased estimate of  $\beta_4$  because the backdoor path from  
80 G-E to Y is blocked by E. The bias in  $b_1$  and  $b_2$  will be the same as above. In the  
81 case in which E is a binary variable, coded 0 and 1,  $b_4$  will be an unbiased estimate  
82 of the difference in the effect of G at  $E = 1$  and  $E = 0$ , but the estimate of the  
83 baseline effect of G on Y when  $E = 0$  will be biased.

84 *S1.3 Bias in  $R^2$*

85 The  $R^2$  for models S4 and S10 will be biased. In the additive case, for example,  
86 the true  $R^2$  attributable to G and E is:

87 
$$\frac{\beta_1^2 \text{var}(G) + \beta_2^2 \text{var}(E) + 2\beta_1\beta_2 \text{cov}(G, E)}{\text{var}(Y)} = \beta_1^2 + \beta_2^2 + 2\beta_1\beta_2\alpha_1 \quad (\text{Equation S11})$$

88 (using the assumption that all the variables have unit standard deviation). But  
89 the reported  $R^2$  from model S4 is:

90 
$$b_1^2 + b_2^2 + 2b_1b_2\alpha_1 \quad (\text{Equation S12})$$

91 Substituting S5 and S6 into S12 we calculate the inflation of  $R^2$  due to  
 92 confounding and collider bias. This is:

93 
$$R^2 \text{ bias} = \alpha_2\beta_3 \left[ \frac{\alpha_2\beta_3}{1-\alpha_1^2} + 2\beta_2 \right] \quad (\text{Equation S13})$$

94 Confounder bias arises from  $\alpha_2\beta_3$ . The derivative of S13 with respect to this  
 95 is positive provided that  $1 - \alpha_1^2 > 0$ . The derivative of S13 with respect to  $\alpha_1$   
 96 (which captures the association between G and E) is:

97 
$$\frac{2\alpha_1\alpha_2^2\beta_3^2}{(1 - \alpha_1^2)^2}$$

98 The sign of this depends on the sign of the numerator. When it is positive  
 99 both confounding and collider bias will inflate the reported  $R^2$ . As an example,  
 100 consider a case in which  $\beta_1 = 0.465, \beta_2 = 0.505, \beta_3 = 0.231, \alpha_1 = 0.209, \alpha_2 = 0.693$ .  
 101 Then the observed  $R^2 = 0.758$ , whereas the true share of the variance in Y  
 102 explained by G and E is 0.569. The inflation bias here is:

103 
$$0.693 \times 0.231 \left[ \frac{0.693 \times 0.231}{1 - 0.209^2} + 2 \times 0.505 \right] = 0.188$$

104 If the correlation between G and E had been larger and/or if the confounding of E  
 105 had been greater, the reported  $R^2$  would have been larger because of the greater  
 106 bias.

107 **S2. Simulation analyses**

108 The code for the simulations and figures is available on Zenodo (DOI:  
109 [10.5281/zenodo.4184673](https://doi.org/10.5281/zenodo.4184673)) and GitHub ([https://github.com/eva-akimova/collider-](https://github.com/eva-akimova/collider-simulations.git)  
110 [simulations.git](https://github.com/eva-akimova/collider-simulations.git)). For the figures presented in the main text, we simulated  
111 scenarios of OLS regressions where G – E association varies between 0 and .5; G  
112 – Y and E – Y coefficients are both positive and .6; uncontrolled confounder, U, is  
113 positively and modestly, moderately or strongly correlated with covariate, E, and  
114 outcome, Y, ( $r = .12$ ,  $r = .25$ , and  $r = .38$  respectively for the three scenarios). For  
115 the gene-environment interaction models we simulated the same settings and  
116 added GxE coefficient at a fixed value of 0.1 for all scenarios.

117 Here, we expand our simulation analyses and further illustrate the bias in  
118 gene-environment interaction models where unobserved confounder, U, interacts  
119 with covariate, E, at a fixed value of 0.2 for all scenarios. Simulation results  
120 presented below in Figure S1 along with a DAG to illustrate the bias.

121

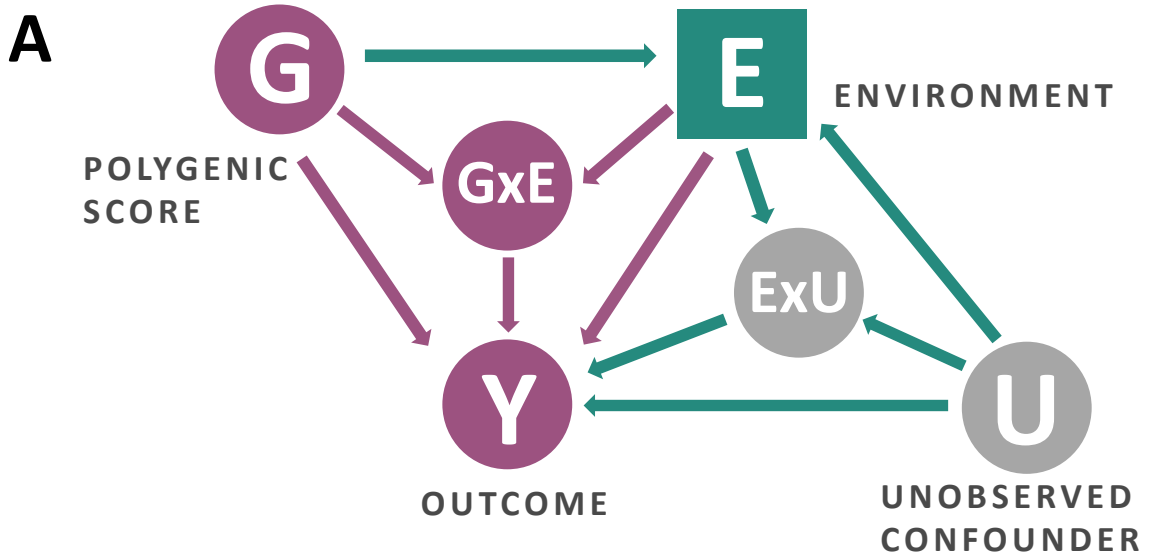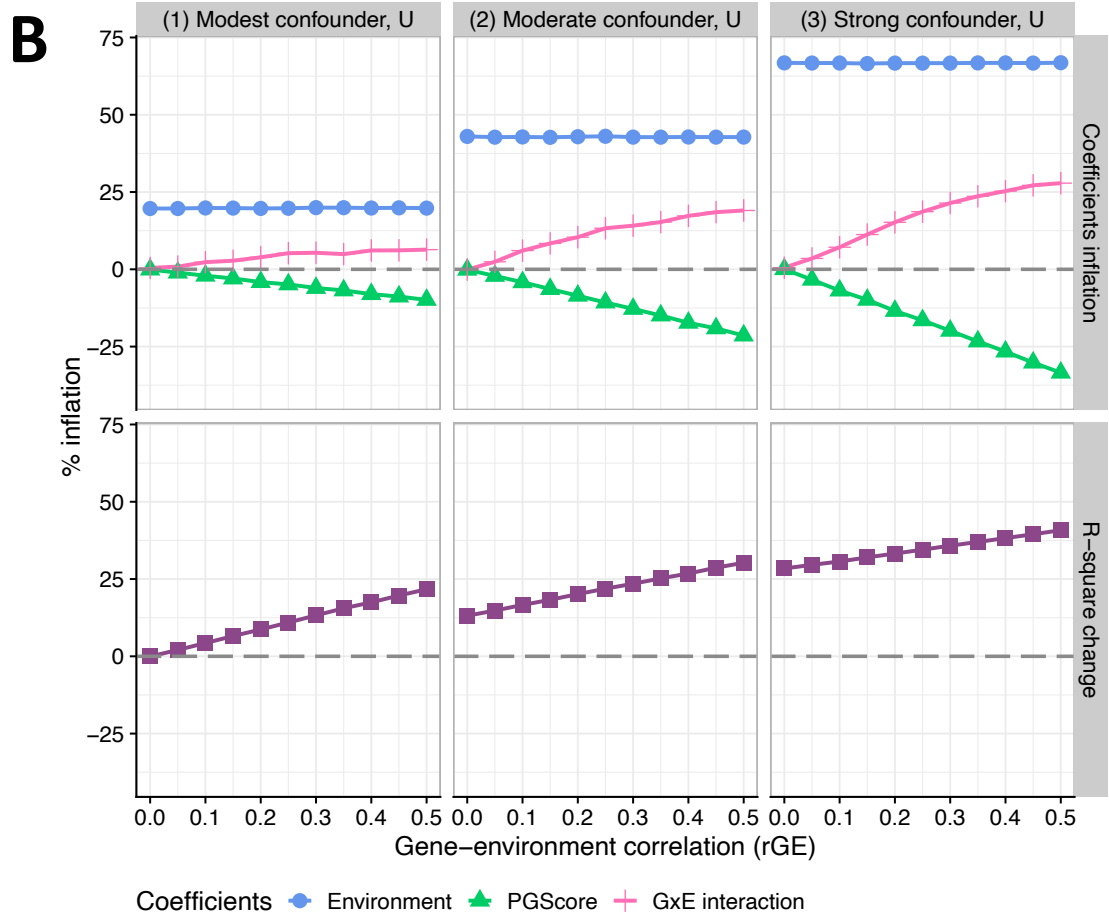

**Figure S1. Collider bias in polygenic gene-environment interaction models**



124 Figure S1. Collider bias in polygenic gene-environment interaction models. Panel  
125 A. Schematic diagram of the collider bias which occurs between polygenic score,  
126 environment, and outcome in cases of gene-environment interdependence. Dark  
127 purple circles represent variables, unobserved confounders and its interaction term  
128 with E are shown in grey circles, collider variables are indicated in squares. By  
129 adding E into the model with the polygenic score G, we make E a collider. A collider  
130 that is not conditioned on, blocks the path between its sources (G and U); once a  
131 collider is controlled for, the path is opened as indicated by green nodes. ExU  
132 interaction term is also on the bias path once E is conditioned on. Panel B (top).  
133 Spurious regression estimates for the polygenic score and environment along with  
134 inflated interaction terms from the series of OLS simulations reflecting a range of  
135 gene-environment interdependence and the presence of modest, moderate, or  
136 strong confounder, U. Collider bias due to positive values of gene-environment  
137 correlation and the presence of an uncontrolled confounder, which is positively  
138 correlated with covariate and outcome, results in deflation of polygenic score  
139 estimates. Deflation is greater the higher the gene-environment correlation;  
140 greater confounding also results in greater bias. The interaction term is affected  
141 proportionally to the strength of  $r_{GE}$  and unobserved confounder, U. Panel B  
142 (bottom). R-squared inflation plot from the series of OLS simulations; collider bias  
143 results in inflated values of explained variance statistics. R-squared statistics for  
144 the model with endogenous covariate and polygenic score includes not only the true  
145 share of the variance in Y explained by G and E (baseline estimate indicated by 0),  
146 but also the elements of variance that are due to gene-environment correlation and  
147 confounder(s), U.

148 **References**

- 149 1. Papageorge, N.W., and Thom, K. (2019). Genes, education, and labor market outcomes:  
150 Evidence from the Health and Retirement Study. *Journal of the European Economic*  
151 *Association* jvz072.  
152
